# Supplementary material for: Structural insight into the distinct regulatory mechanism of the HEPN–MNT toxin-antitoxin system in Legionella pneumophila
Source: Springer Nature journal article supplement (doi:10.1038/s41467-024-54551-0), 2024-11-24
Supplement: MOESM1 [file 41467_2024_54551_MOESM1_ESM.pdf]

# Supplementary information

## Structural insight into the distinct regulatory mechanism of the HEPN–MNT toxin–antitoxin system in *Legionella pneumophila*

Authors: Chenglong Jin<sup>1,2,8</sup>, Cha-Hee Jeon<sup>1,3,8</sup>, Heung Wan Kim<sup>1</sup>, Jin Mo Kang<sup>1,3</sup>, Yuri Choi<sup>4</sup>, Sung-Min Kang<sup>5</sup>, Hyung Ho Lee<sup>4</sup>, Do-Hee Kim<sup>6,9</sup>, Byung Woo Han<sup>1,3,9</sup> and Bong-Jin Lee<sup>2,7,9</sup>

### Affiliations

<sup>1</sup> The Research Institute of Pharmaceutical Sciences, College of Pharmacy, Seoul National University, Seoul 08826, Republic of Korea

<sup>2</sup> MasterMediTech, Seoul 07793, Republic of Korea

<sup>3</sup> Natural Products Research Institute, College of Pharmacy, Seoul National University, Seoul 08826, Republic of Korea

<sup>4</sup> Department of Chemistry, College of Natural Sciences, Seoul National University, Seoul 08826, Republic of Korea

<sup>5</sup> College of Pharmacy, Duksung Women's University, Seoul 01369, Republic of Korea

<sup>6</sup> Research Institute of Pharmaceutical Sciences, College of Pharmacy, Sookmyung Women's University, Seoul, 04310, Republic of Korea

<sup>7</sup> College of Pharmacy, Ajou University, Suwon 16499, Republic of Korea

<sup>8</sup> These authors contributed equally: Chenglong Jin and Cha-Hee Jeon

<sup>9</sup> These authors jointly supervised this work: Do-Hee Kim, Byung Woo Han and Bong-Jin Lee

### Corresponding authors:

- Do-Hee Kim (E-mail: [dohee.kim@sookmyung.ac.kr](mailto:dohee.kim@sookmyung.ac.kr))
- Byung Woo Han (E-mail: [bwhan@snu.ac.kr](mailto:bwhan@snu.ac.kr))
- Bong-Jin Lee (E-mail: [lbj@nrm.snu.ac.kr](mailto:lbj@nrm.snu.ac.kr))

### This file contains:

- Supplementary Figure 1–11
- Supplementary Table 1–4

# Supplementary Figure 1

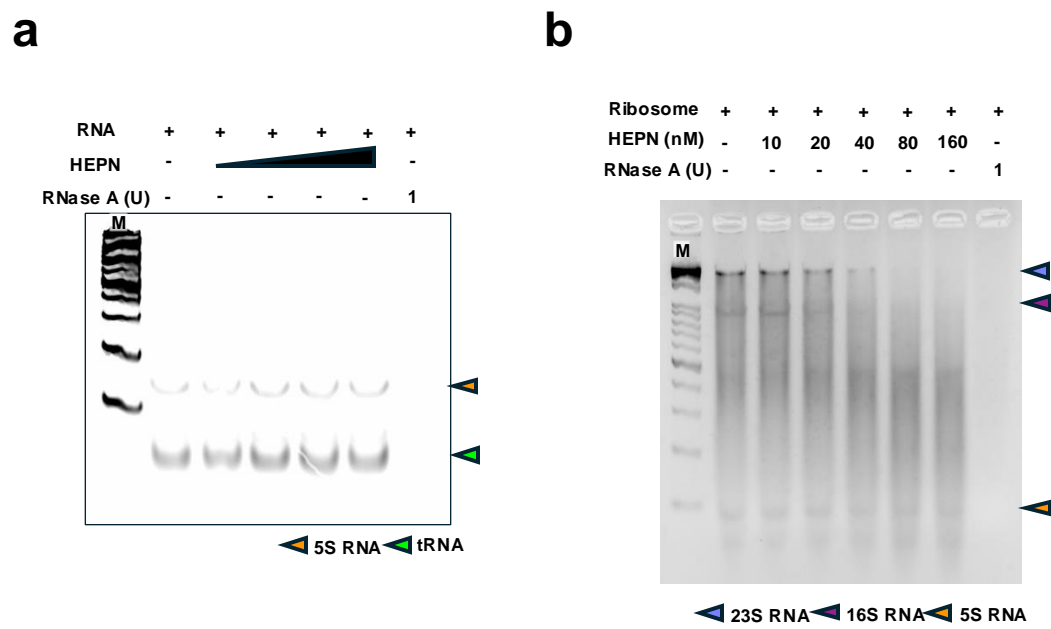

**Supplementary Fig. 1. *In Vitro* RNase Assay**

**a** A 12% polyacrylamide gel shows that dimeric HEPN<sup>Lpg</sup> does not digest 5S rRNA and tRNA. Dimeric HEPN<sup>Lpg</sup> was tested at varying concentrations (20 nM–160 nM) in this assay. **b** A 1.8% agarose gel shows that dimeric HEPN<sup>Lpg</sup> cleaves 23S rRNA and 16S rRNA present in an intact 70S ribosome. The 70S ribosome from an *E. coli* B strain was used for this assay. RNase A (1 U) was used as a positive control.

# Supplementary Figure 2

a

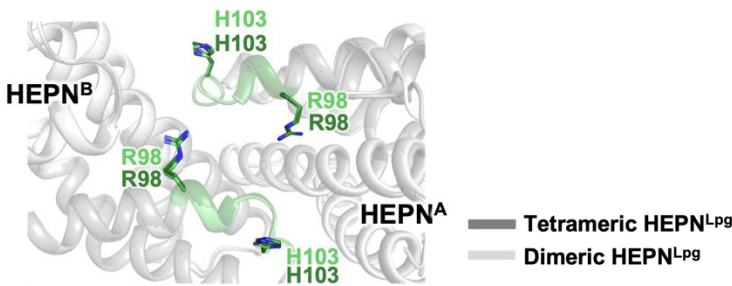

b

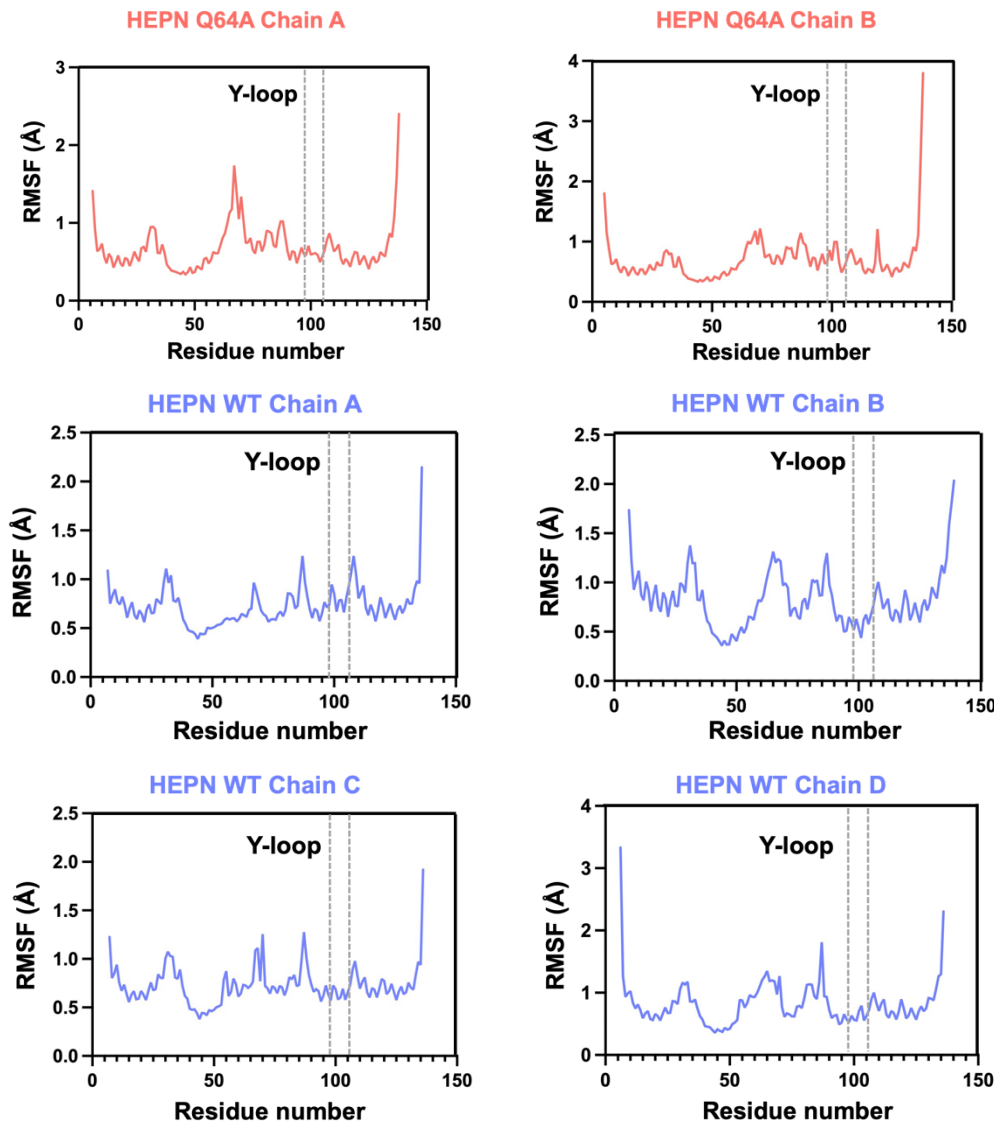

**Supplementary Fig. 2. Structural comparison of the Y-loop region of HEPN<sup>Lpg</sup> in two oligomeric states.**

**a** Structural alignment of the HEPN<sup>Lpg</sup> dimer from the crystal structures of tetrameric and dimeric HEPN<sup>Lpg</sup>. The Y-loop region from tetrameric HEPN<sup>Lpg</sup> and dimeric HEPN<sup>Lpg</sup> is highlighted in dark green and lime, respectively. **b** RMSF analysis of HEPN<sup>Lpg</sup> in two oligomeric states. The RMSF values of the C $\alpha$  atoms are plotted as a function of residues for chains A/B of dimeric HEPN<sup>Lpg</sup> and chains A/B/C/D of tetrameric HEPN<sup>Lpg</sup>. The residues located in the Y-loop regions are indicated with dashed boxes.

# Supplementary Figure 3

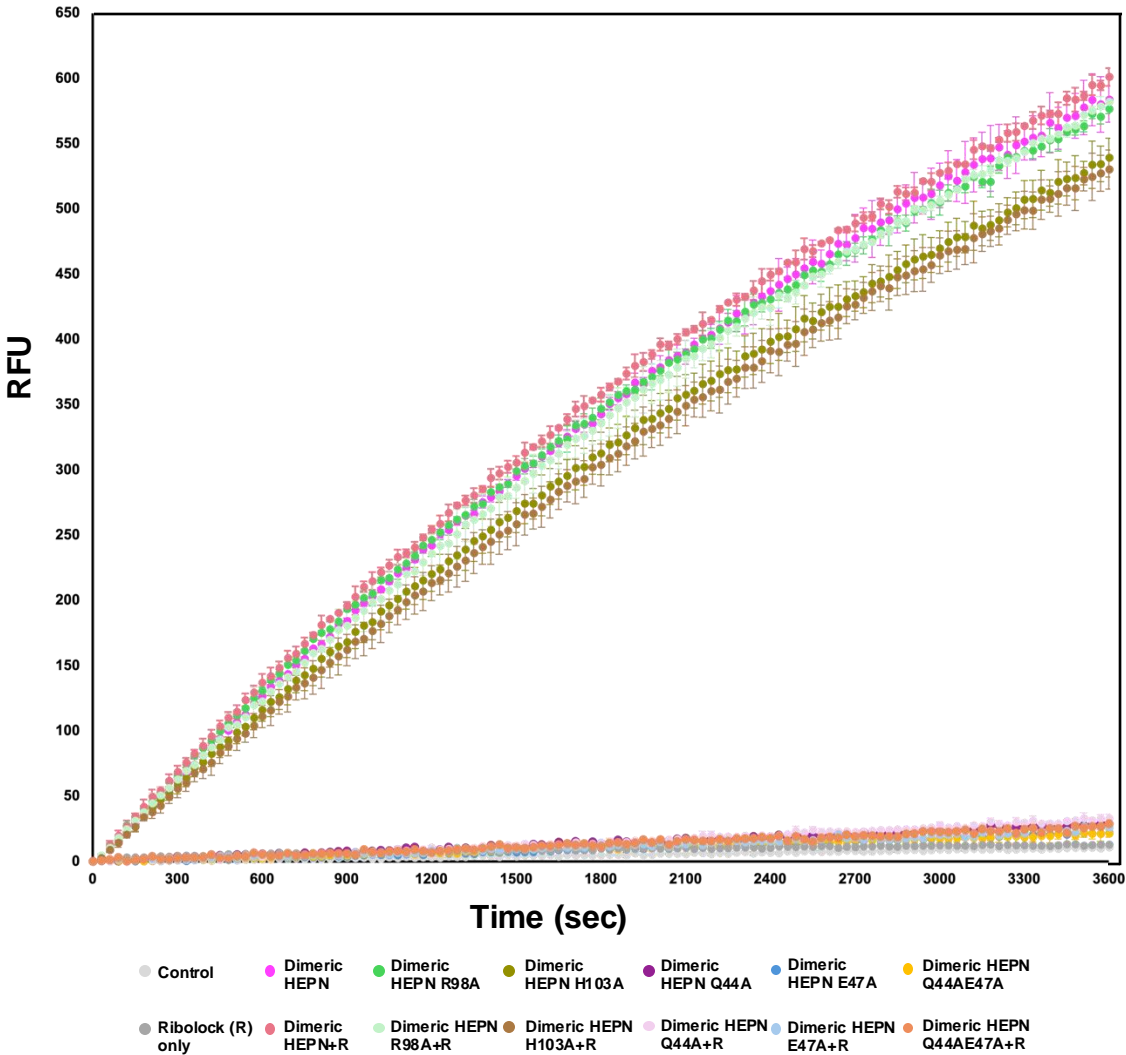

**Supplementary Fig. 3. *In vitro* RNase activity assay**

Fluorescence kinetics measured for dimeric HEPN<sup>Lpg</sup> and its mutants with and without treatment of Ribolock RNase inhibitor. Minimal RFU variation between Ribolock-treated and untreated samples confirms the specificity of RNase activity, ruling out contamination by external RNases. The data are presented as the average of two independent replicates with standard deviation ( $\pm$ SD).

# Supplementary Figure 4

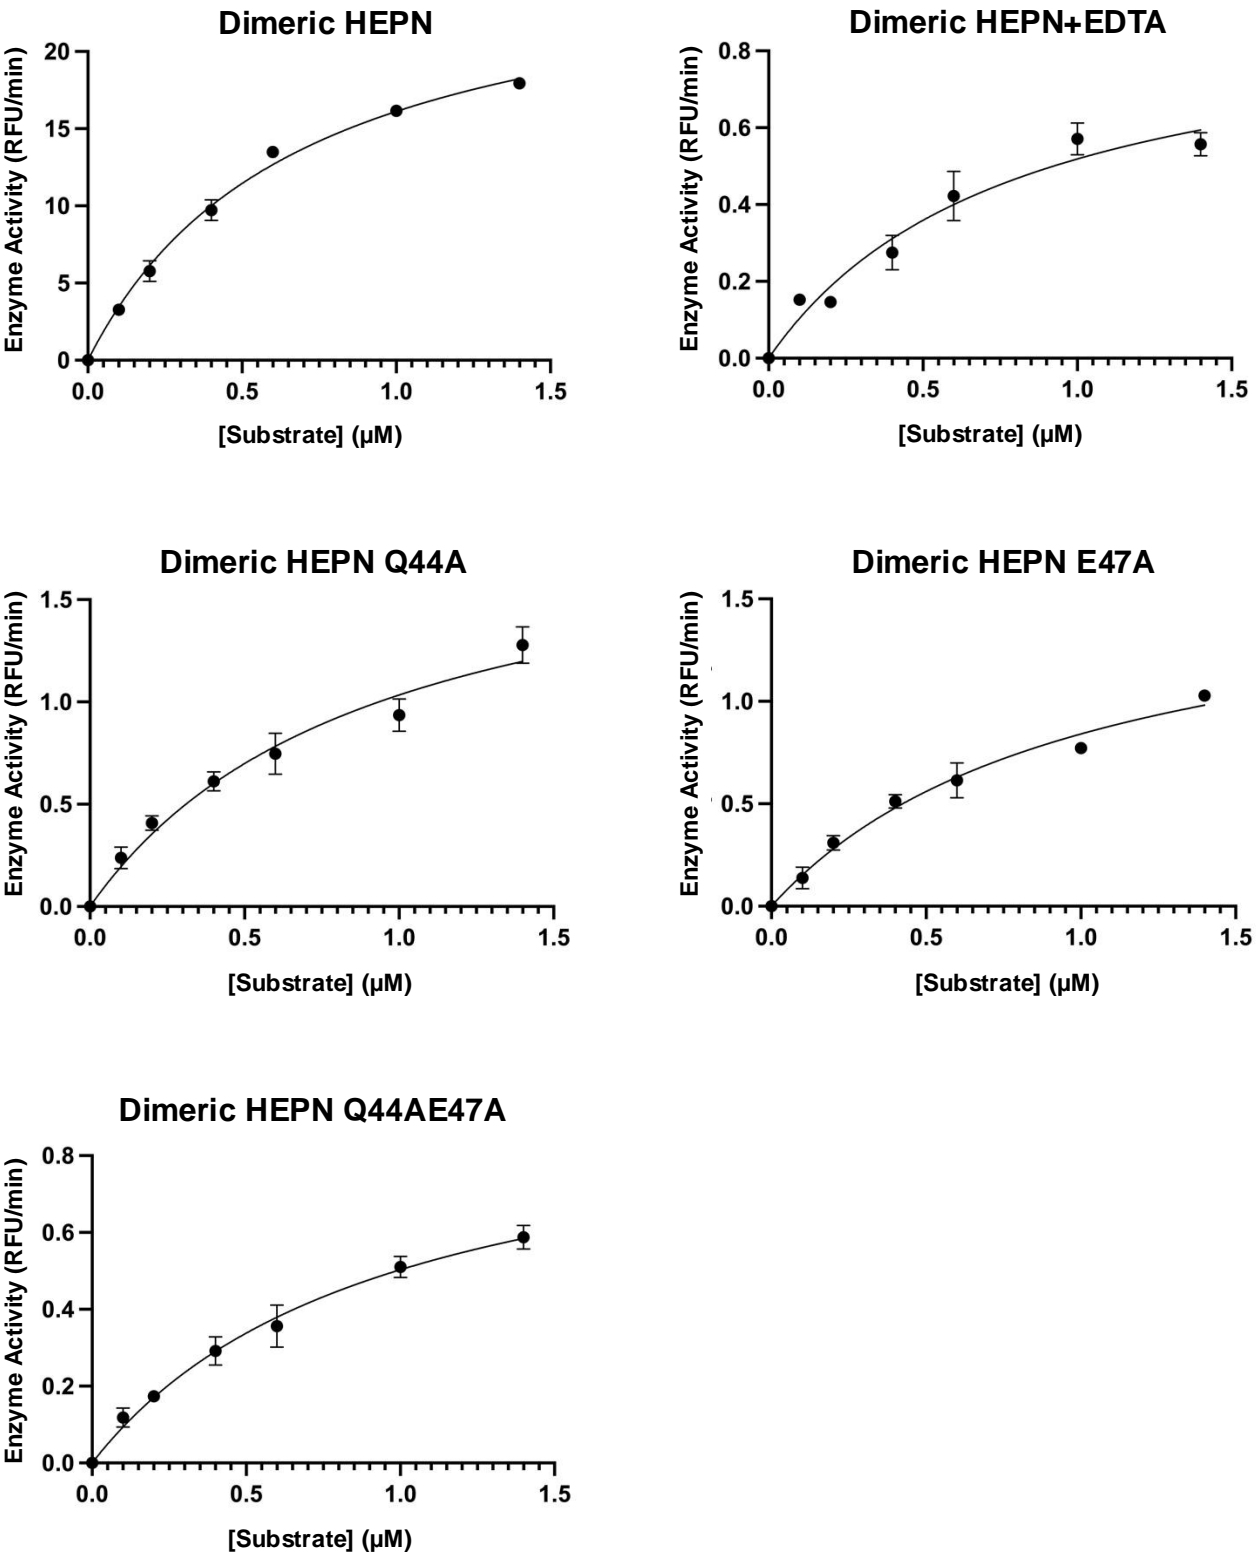

**Supplementary Fig. 4. Plot of  $v$  versus  $[S]$  according to the Michaelis–Menten equation.**

Dimeric HEPN<sup>Lpg</sup>, EDTA-treated dimeric HEPN<sup>Lpg</sup>, dimeric HEPN<sup>Lpg</sup> Q44A, dimeric HEPN<sup>Lpg</sup> E47A and dimeric HEPN<sup>Lpg</sup> Q44AE47A were subjected to *in vitro* RNase assays. The resulting data were processed using the Michaelis–Menten equation, and the results are presented in Supplementary Table 2.

# Supplementary Figure 5

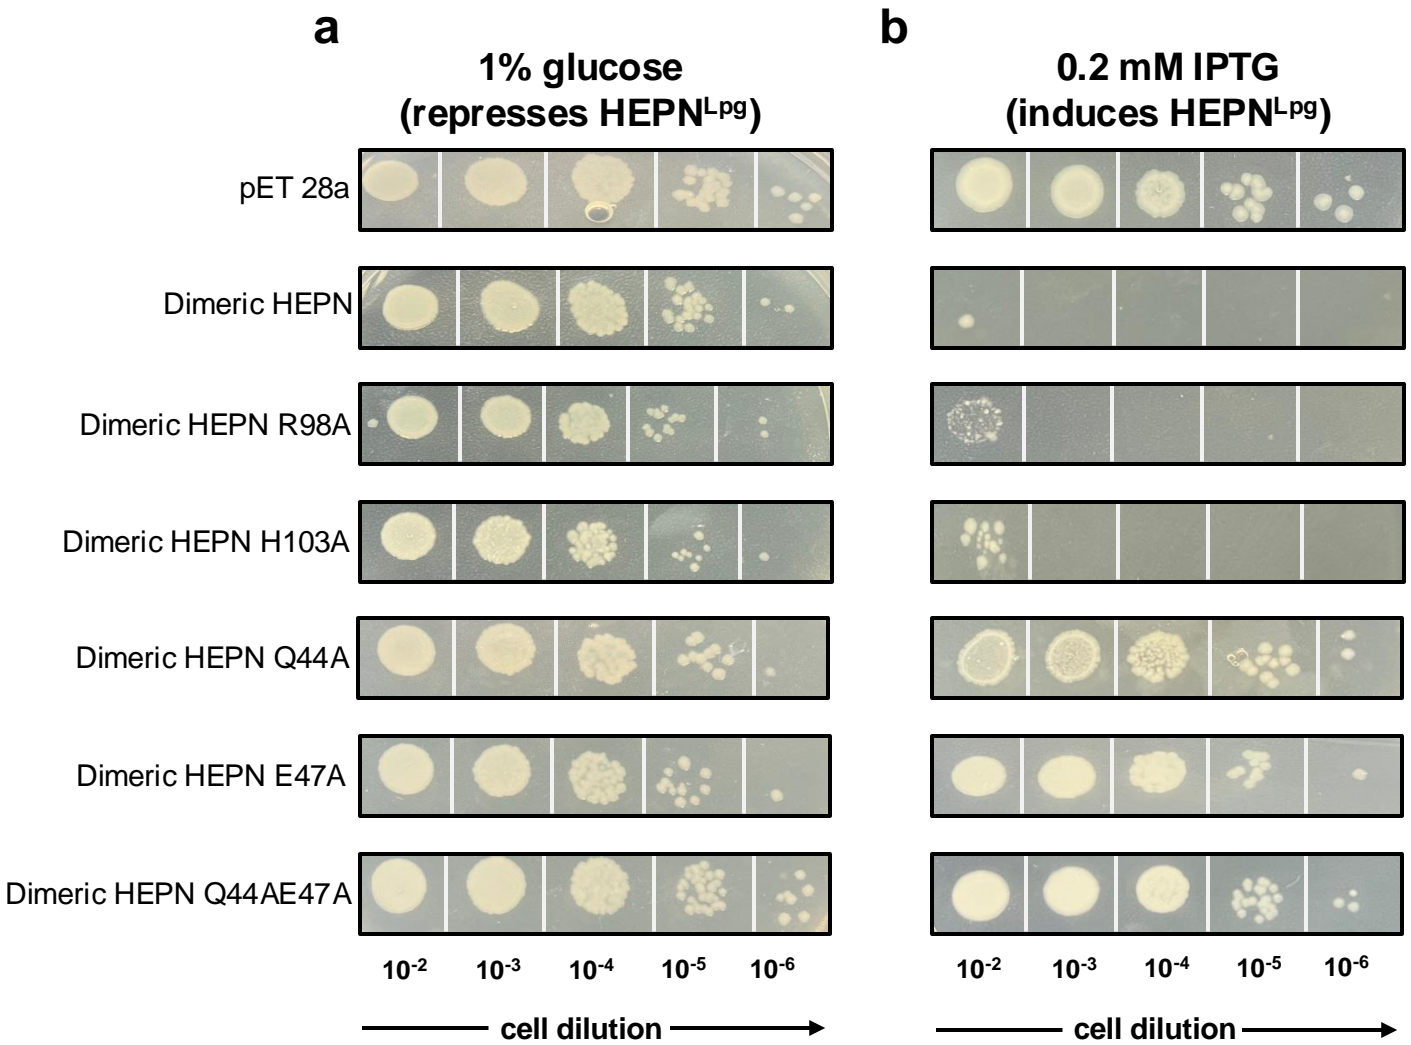

**Supplementary Fig. 5. *In vivo* spot-plating assay**

*E. Coli* Rosetta2 (DE3) cells harboring pET 28a vector with each HEPN<sup>Lpg</sup> variant as indicated. The plates contains 1% glucose to repress background expression from T7 promotor (**a**) and 0.2 mM IPTG to induce HEPN<sup>Lpg</sup> expression (**b**).

# Supplementary Figure 6

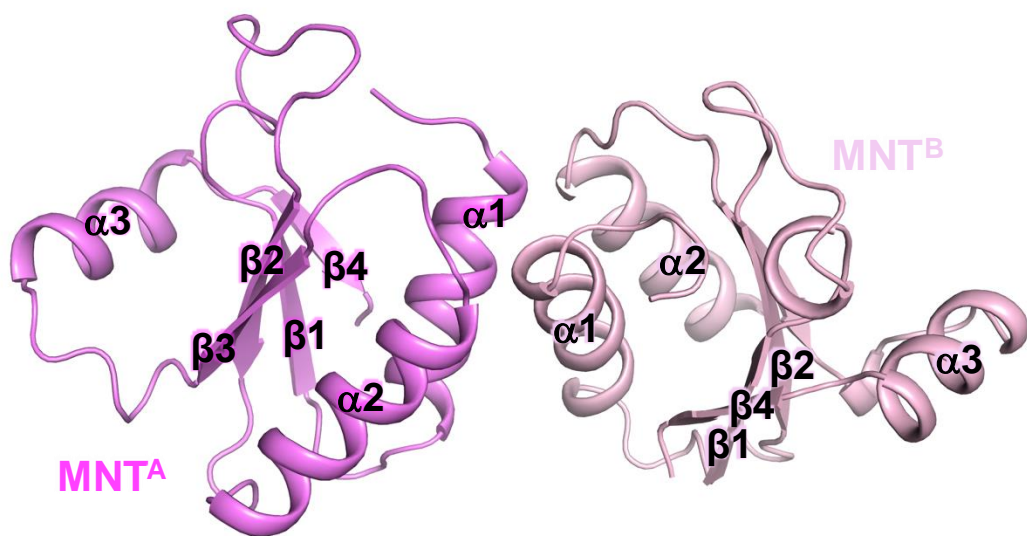

**Supplementary Fig. 6. Overall structure of MNT<sup>Lpg</sup>.**

MNT<sup>Lpg</sup> forms a homodimer in the asymmetric unit (ASU). Chains A and B of MNT are represented in violet and pink, respectively.

# Supplementary Figure 7

**a**

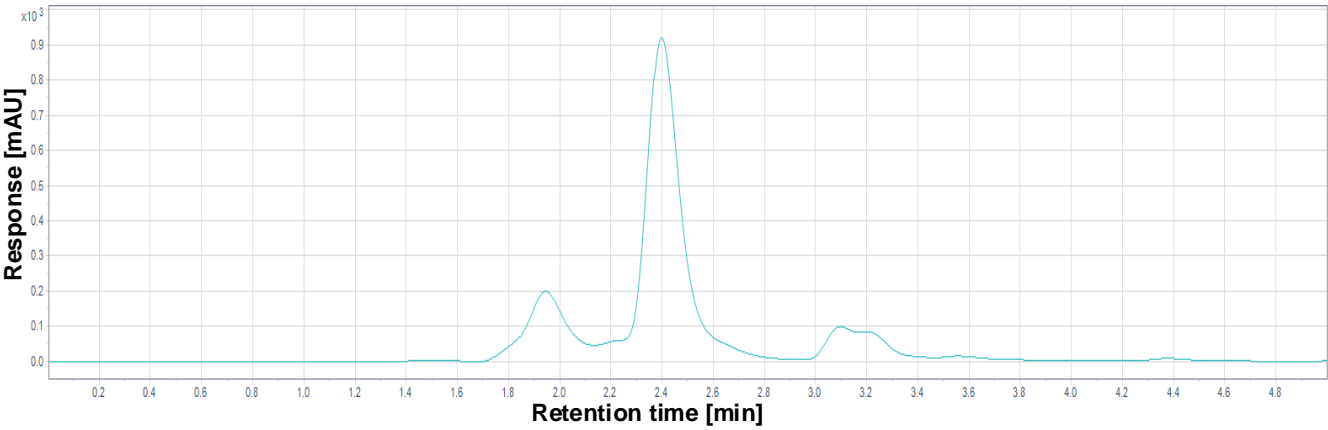

**b**

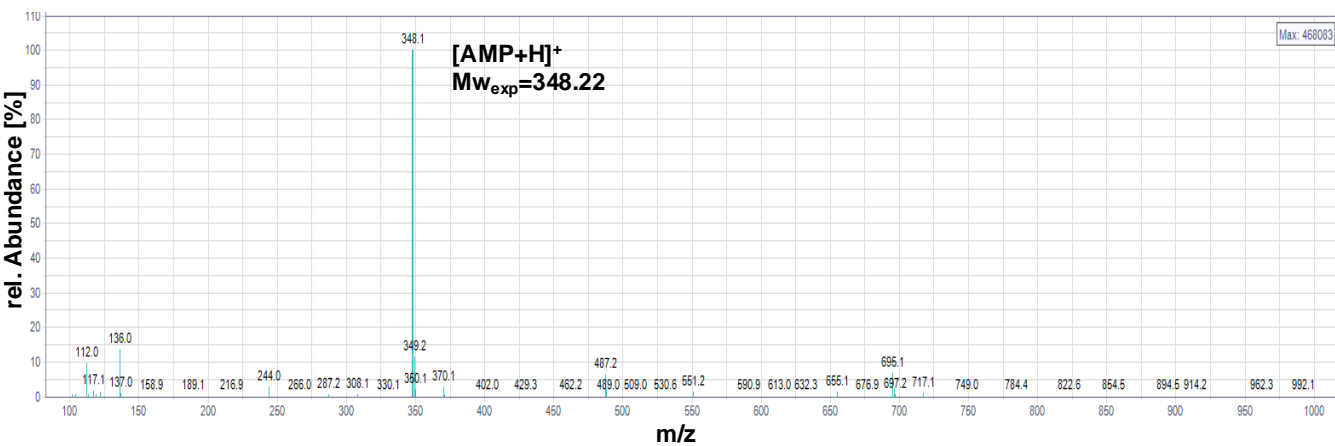

**Supplementary Fig. 7. Analysis and characterization of NMPs digested from NMPylated HEPN<sup>Lpg</sup> using LC–MS.**

**a** The sample was separated by HPLC, and the peaks were measured and collected at 260 nm. **b** The separated sample was ionized, and the mass-to-charge ratio ( $m/z$ ) was determined by an MS system. The obtained result revealed a peak at  $m/z$  348.1, corresponding to the molecular weight of AMP.



# Supplementary Figure 8

**a**

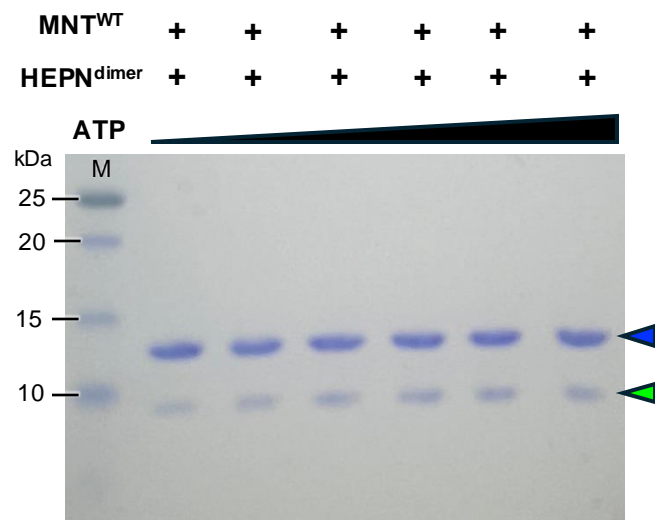

**b**

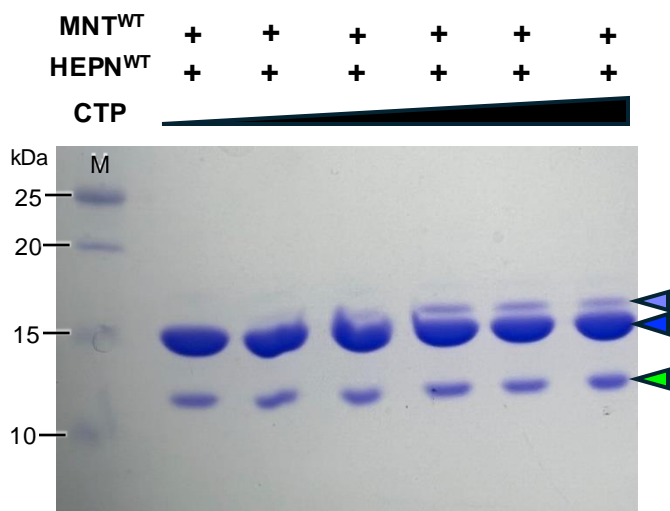

**c**

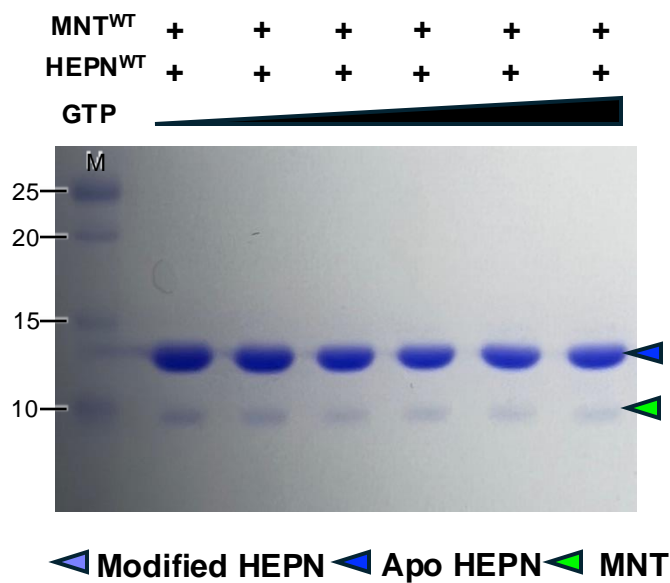

▶ Modified HEPN ▶ Apo HEPN ▶ MNT

**Supplementary Fig. 8. *In vitro* NMPylation assay.**

**a** *In vitro* AMPylation assay conducted by dimeric HEPN<sup>Lpg</sup> and MNT<sup>Lpg</sup> WT

*In vitro* CMPylation assay (**b**) and *in vitro* GMPylation assay (**c**) were conducted by HEPN<sup>Lpg</sup> WT and MNT<sup>Lpg</sup> WT. All experiments involved increasing the substrate concentration.

Supplementary Figure 9

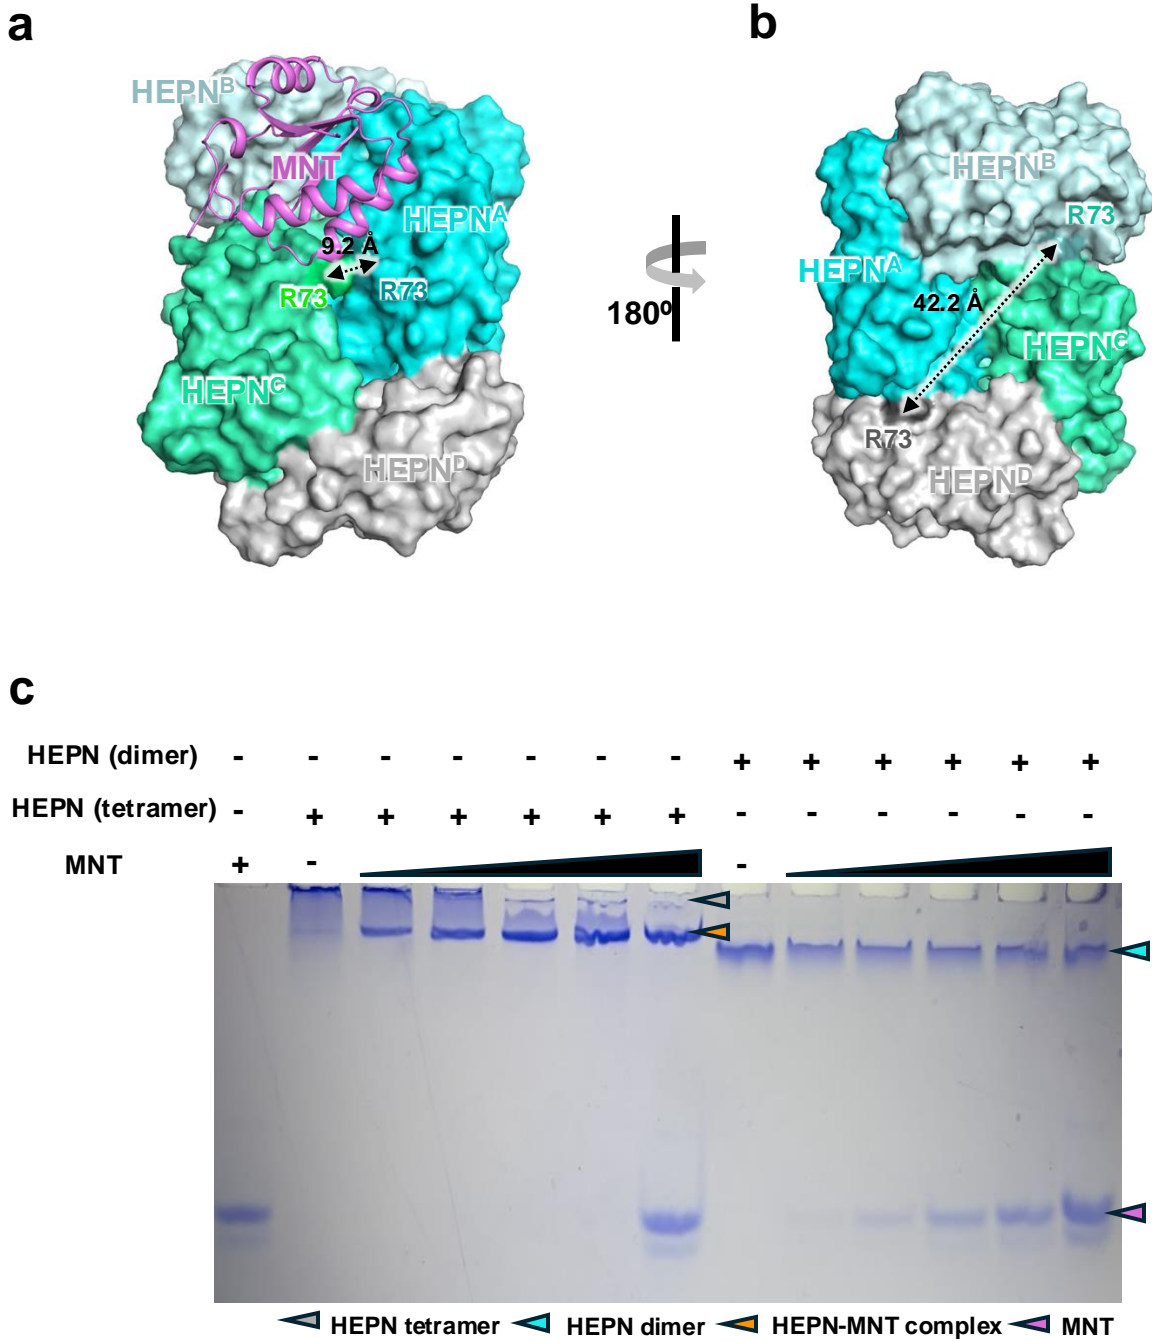

Supplementary Fig. 9. The binding stoichiometry between HEPN<sup>Lpg</sup> and MNT<sup>Lpg</sup>.

**a, b** Overall structure of the HEPN<sup>Lpg</sup>-MNT<sup>Lpg</sup> complex. The front (**a**) and opposite (**b**) perspectives aligning with the viewpoints presented in Fig. 8a, b. The distance between R73 residues in chains A and C is 9.2 Å, while the distance between R73 residues in chains B and D is 42.2 Å. **c** Analysis of binding stoichiometry by Coomassie blue-stained native-PAGE. MNT<sup>Lpg</sup> was subjected to incubation with dimeric or tetrameric HEPN<sup>Lpg</sup> at the following ratios: 1:5, 1:2, 1:1, 2:1 and 5:1. HEPN<sup>Lpg</sup> Q64A was used as dimeric form of HEPN<sup>Lpg</sup>. The formation of a HEPN<sup>Lpg</sup>-MNT<sup>Lpg</sup> complex occurred exclusively when MNT<sup>Lpg</sup> was introduced to tetrameric HEPN<sup>Lpg</sup>.

# Supplementary Figure 10

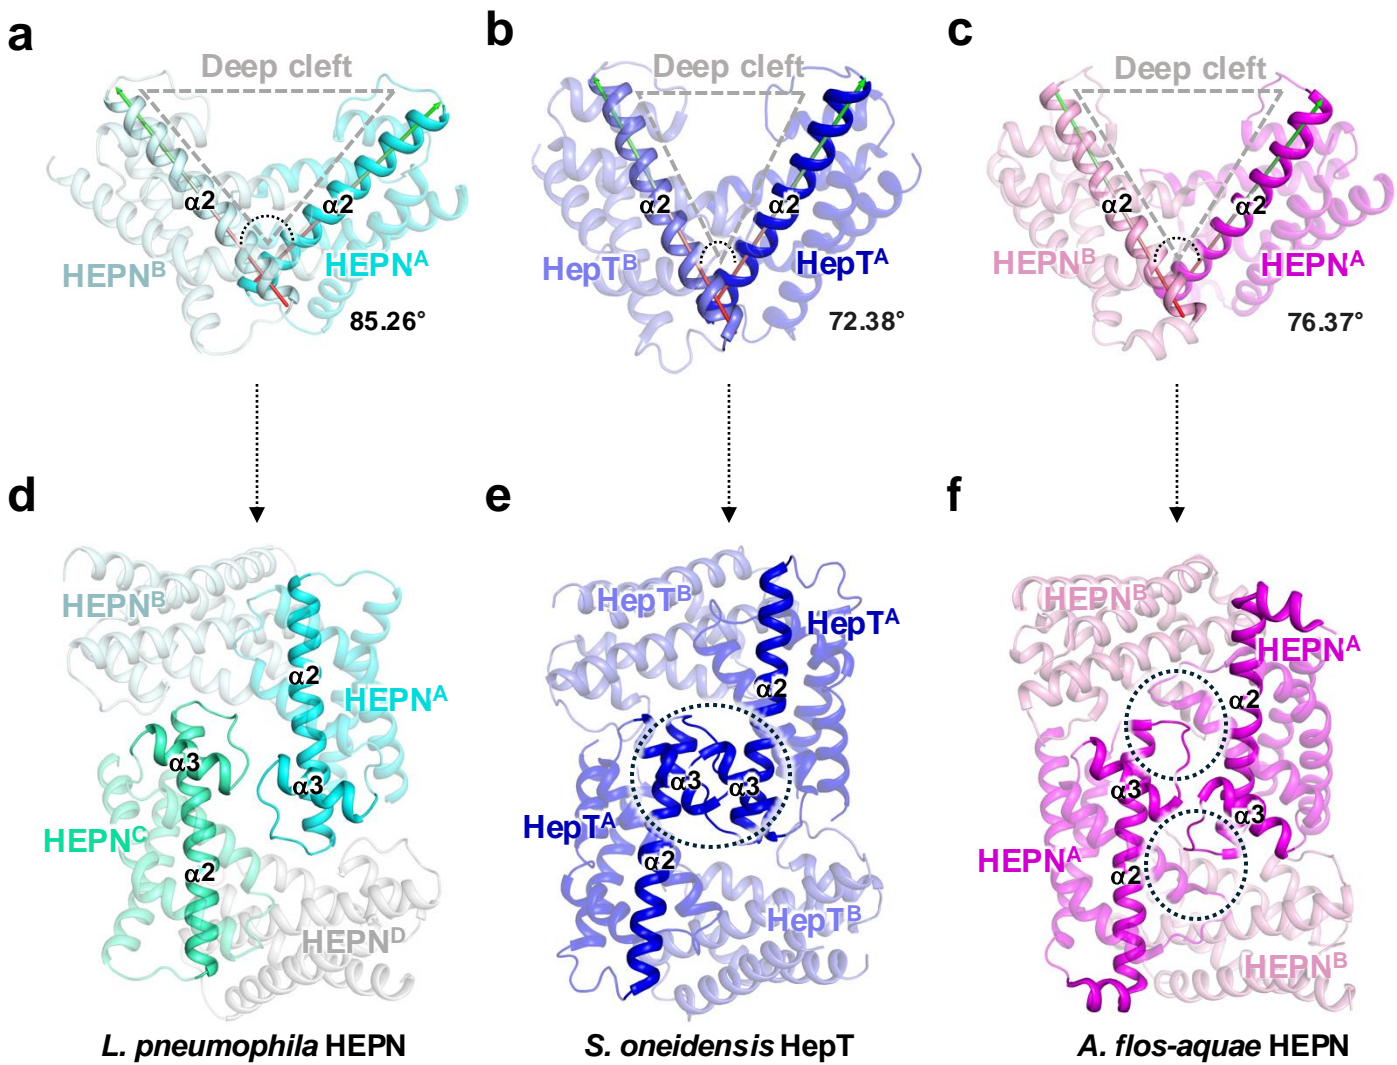

**Supplementary Fig. 10. Molecular basis of oligomeric state transition.**

Dimeric state of HEPN from *L. pneumophila* (a), *S. oneidensis* (b) and *A. flos-aqua* (c). The deep cleft region is indicated by a dashed triangle, and the angle between the  $\alpha 2$  helix and each monomer was calculated by *PyMOL*. **d** Crystal structure of HEPN<sup>L-pg</sup> WT; **e** Tetrameric HepT model from *S. oneidensis*; **f** Tetrameric HEPN model from *A. flos-aquae*. The tetrameric structures of HepT from *S. oneidensis* and HEPN from *A. flos-aquae* were constructed using the crystal structure of HEPN<sup>L-pg</sup> WT as a model. The  $\alpha 2$  and  $\alpha 3$  helices involved in tetrameric interfaces are highlighted. Due to the constricted space within a deep cleft, a steric clash would occur upon the assembly of *S. oneidensis* HepT and *A. flos-aquae* HEPN into a tetramer. The specific clash sites are indicated by black dashed circles.

# Supplementary Figure 11

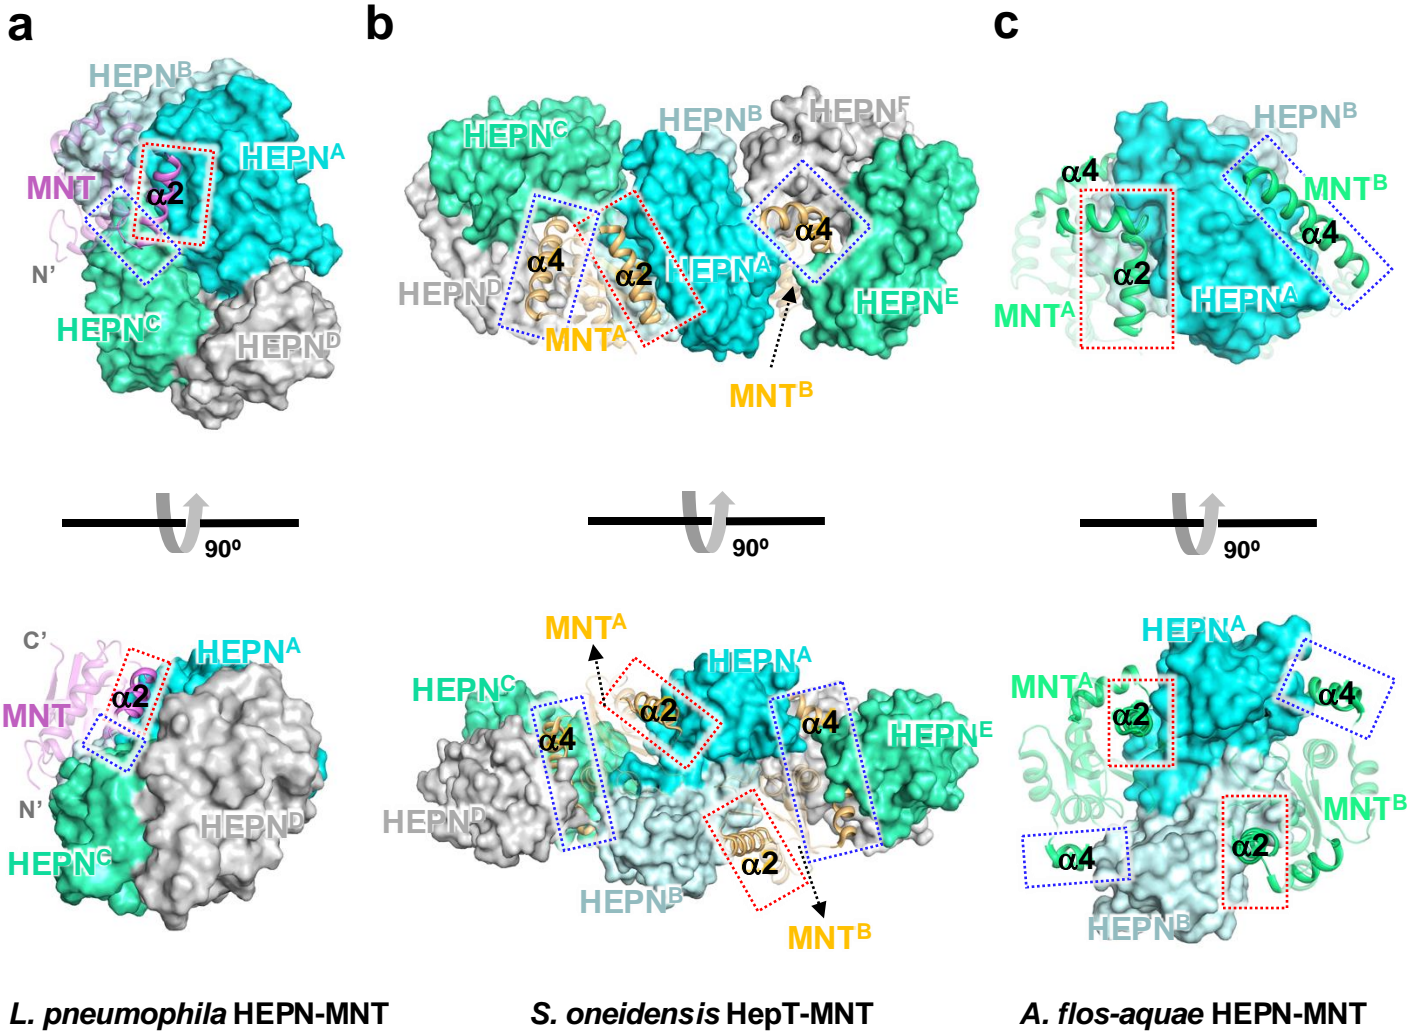

Supplementary Fig. 11. Comparison of the HEPN<sup>Lpg</sup>-MNT<sup>Lpg</sup> complex with its homologs.

**a** The HEPN-MNT complex from *L. pneumophila*. **b** The HEPN-MNT complex from *S. oneidensis* (PDB ID: 7BXO). **c** The HEPN-MNT complex from *A. flos-aqua* (PDB ID: 7AE2). MNTs and HEPNs are depicted as cartoons and surfaces, respectively. The  $\alpha 2$  helices in MNT from all three homologs participate in interacting with HEPN, establishing a “primary docking site”. Additionally, the  $\alpha 4$  helices in MNT from *S. oneidensis* and *A. flos-aqua* contribute to a “secondary docking site”, whereas in MNT<sup>Lpg</sup>, a loop region following the  $\alpha 2$  helix is implicated in this site. The primary docking site and secondary docking site are indicated by red and blue dashed squares, respectively.

**Supplementary Table 1.** Surface area of the crystal structures of the HEPN<sup>Lpg</sup>–MNT<sup>Lpg</sup> module

| Type of interface | HEPN <sup>Lpg</sup> WT                          | Surface area (Å <sup>2</sup> ) |               | Entire surface area (Å <sup>2</sup> ) | Buried surface Area (Å <sup>2</sup> ) | Buried surface area percentage (%) |
|-------------------|-------------------------------------------------|--------------------------------|---------------|---------------------------------------|---------------------------------------|------------------------------------|
| Dimeric           | Chains A/B                                      | Chain A: 7214                  | Chain B: 7339 | 14553                                 | 882                                   | 6.1                                |
|                   | Chains C/D                                      | Chain C: 7121                  | Chain D: 7265 | 14386                                 | 874                                   | 6.1                                |
| Tetrameric        | Chains A/D                                      | Chain A: 7214                  | Chain D: 7265 | 14479                                 | 405                                   | 2.8                                |
|                   | Chains B/C                                      | Chain B: 7339                  | Chain C: 7121 | 14460                                 | 419                                   | 2.9                                |
|                   | Chains A/C                                      | Chain A: 7214                  | Chain C: 7121 | 14335                                 | 311                                   | 2.2                                |
| Type of interface | HEPN <sup>Lpg</sup> Q64A                        | Surface area (Å <sup>2</sup> ) |               | Entire surface area (Å <sup>2</sup> ) | Buried surface Area (Å <sup>2</sup> ) | Buried surface area percentage (%) |
| Dimeric           | Chains A/B                                      | Chain A: 7490                  | Chain B: 7607 | 15097                                 | 928                                   | 6.1                                |
| Type of interface | HEPN <sup>Lpg</sup> –MNT <sup>Lpg</sup> complex | Surface area (Å <sup>2</sup> ) |               | Entire surface area (Å <sup>2</sup> ) | Buried surface Area (Å <sup>2</sup> ) | Buried surface area percentage (%) |
| Dimeric           | Chains A/B                                      | Chain A: 7744                  | Chain B: 7167 | 14911                                 | 848                                   | 5.7                                |
|                   | Chains C/D                                      | Chain C: 7438                  | Chain D: 6941 | 14379                                 | 975                                   | 6.8                                |
| Tetrameric        | Chains A/D                                      | Chain A: 7744                  | Chain D: 6941 | 14685                                 | 430                                   | 2.9                                |
|                   | Chains B/C                                      | Chain B: 7167                  | Chain C: 7438 | 14605                                 | 434                                   | 3.0                                |
|                   | Chains A/C                                      | Chain A: 7744                  | Chain C: 7438 | 15182                                 | 273                                   | 1.8                                |
| HEPN–MNT complex  | Chians A/E                                      | Chain A: 7744                  | Chain E: 6224 | 13968                                 | 512                                   | 3.7                                |
|                   | Chains C/E                                      | Chain C: 7438                  | Chain E: 6224 | 13662                                 | 629                                   | 4.6                                |



**Supplementary Table 2.** Relative RNase activity of dimeric HEPN<sup>Lpg</sup> and its variants

| HEPN <sup>Lpg</sup>                        | $V_{max}$ | $k_{cat}^a$ | $K_m^a$ | $k_{cat}/K_m$ |
|--------------------------------------------|-----------|-------------|---------|---------------|
| <b>Dimeric HEPN<sup>Lpg</sup></b>          | 27.18     | 271.80      | 0.69    | 393.91        |
| <b>Dimeric HEPN<sup>Lpg</sup>+EDTA</b>     | 0.93      | 9.34        | 0.80    | 11.68         |
| <b>Dimeric HEPN<sup>Lpg</sup> Q44A</b>     | 1.99      | 19.88       | 0.92    | 21.61         |
| <b>Dimeric HEPN<sup>Lpg</sup> E47A</b>     | 1.69      | 16.86       | 1.01    | 16.69         |
| <b>Dimeric HEPN<sup>Lpg</sup> Q44AE47A</b> | 0.98      | 9.83        | 0.95    | 10.35         |

<sup>a</sup>The units for  $k_{cat}$  and  $K_m$  are defined as RFU min<sup>-1</sup> μM<sup>-1</sup> and μM, respectively.

**Supplementary Table 3.** Oligonucleotides used in the study

| Oligomer                                   | Sequence                                                             |
|--------------------------------------------|----------------------------------------------------------------------|
| HEPN <sup>Lpg</sup> -F                     | 5'-GGA ATT CCA TAT GAC CAA TAT CGA TGT TCG C-3'                      |
| HEPN <sup>Lpg</sup> -R                     | 5'-CCG CTCGAG TTA TTC ATG CTC TTT CAG ACC-3'                         |
| MNT <sup>Lpg</sup> -F                      | 5'-GGA ATT CCA TAT GAA TGA GCA ATT AAA CC-3'                         |
| MNT <sup>Lpg</sup> -R                      | 5'-CCG CTCGAG TTA CGA TTC TTT TGT ATAAAA C-3'                        |
| HEPN <sup>Lpg</sup> -MNT <sup>Lpg</sup> -F | 5'-GGA ATT CCA TAT GAC CAA TAT CGA TGT TCG C-3'                      |
| HEPN <sup>Lpg</sup> -MNT <sup>Lpg</sup> -R | 5'-CCG CTC GAG TTA CGA TTC TTT TGT ATAAAA CAG G-3'                   |
| HEPN <sup>Lpg</sup> R98A-F                 | 5'-GGA TGG AAA TGA TTA AAA GTG CCA ACC AAA CCT CTC ATA<br>CCT A-3'   |
| HEPN <sup>Lpg</sup> R98A-R                 | 5'-TAG GTA TGA GAG GTT TGG TTG GCA CTT TTA ATC ATT TCC<br>ATC C-3'   |
| HEPN <sup>Lpg</sup> H103A-F                | 5'-AAA AGT CGC AAC CAA ACC TCT GCT ACC TAC AAC CAA TCC<br>GTT GCC-3' |
| HEPN <sup>Lpg</sup> H103A-R                | 5'-GGC AAC GGA TTG GTT GTA GGT AGC AGA GGT TTG GTT GCG<br>ACT TTT-3' |
| HEPN <sup>Lpg</sup> Q44A-F                 | 5'-GGA AAA GCA AGG CTT AAT CGC AGC CTT TGA ATT TAC CCA<br>TG-3'      |
| HEPN <sup>Lpg</sup> Q44A-R                 | 5'-CAT GGG TAA ATT CAA AGG CTG CGA TTA AGC CTT GCT TTT<br>CC-3'      |
| HEPN <sup>Lpg</sup> E47A-F                 | 5'-CTT AAT CCA AGC CTT TGC ATT TAC CCA TGA GCT GG-3'                 |
| HEPN <sup>Lpg</sup> E47A-R                 | 5'-CCA GCT CAT GGG TAA ATG CAA AGG CTT GGA TTA AG-3'                 |
| HEPN <sup>Lpg</sup> Q44AE47A-F             | 5'-AAA GCA AGG CTT AAT CGC AGC CTT TGC ATT TAC CCA TGA<br>GCT GG-3'  |
| HEPN <sup>Lpg</sup> Q44AE47A-R             | 5'-CCA GCT CAT GGG TAA ATG CAA AGG CTG CGA TTA AGC CTT<br>GCT TT-3'  |
| HEPN <sup>Lpg</sup> Q64A-F                 | 5'-TGAAAG ATT ATT TCT TTT TCG CGG GAAATT CTG CAA TTA CTG<br>G-3'     |
| HEPN <sup>Lpg</sup> Q64A-R                 | 5'-CCA GTA ATT GCA GAA TTT CCC GCG AAA AAG AAA TAA TCT<br>TTC A-3'   |
| HEPN <sup>Lpg</sup> R73A-F                 | 5'-CTG CAA TTA CTG GTT CTG CTG ATG CAA CAC GCG AAT C-3'              |
| HEPN <sup>Lpg</sup> R73A-R                 | 5'-GAT TCG CGT GTT GCA TCA GCA GAA CCA GTAATT GCA G-3'               |
| MNT <sup>Lpg</sup> G36AS37T-F              | 5'-TGA TAA TGC GAT TCT CTA CGC AAC TCG TGC CAA AGG CAC<br>ATA TC-3'  |
| MNT <sup>Lpg</sup> G36AS37T-R              | 5'-GAT ATG TGC CTT TGG CAC GAG TTG CGT AGA GAA TCG CAT<br>TAT CA-3'  |
| MNT <sup>Lpg</sup> D48E-F                  | 5'-GGC ACA TAT CAT CAG GGC TCA GAG ATT GAT CTT TGC CTT<br>ACC GGA-3' |

|                               |                                                                      |
|-------------------------------|----------------------------------------------------------------------|
| MNT <sup>Lpg</sup> D48E-R     | 5'-TCC GGT AAG GCA AAG ATC AAT CTC TGA GCC CTG ATG ATA<br>TGT GCC-3' |
| MNT <sup>Lpg</sup> D50E-F     | 5'-CAT CAG GGC TCA GAT ATT GAG CTT TGC CTT ACC GGAAAC-<br>3'         |
| MNT <sup>Lpg</sup> D50E-R     | 5'-GTT TCC GGT AAG GCA AAG CTC AAT ATC TGA GCC CTG ATG-<br>3'        |
| MNT <sup>Lpg</sup> D48ED50E-F | 5'-CAT ATC ATC AGG GCT CAG AGA TTG AGC TTT GCC TTA CCG<br>GAA A-3'   |
| MNT <sup>Lpg</sup> D48ED50E-R | 5'-TTT CCG GTA AGG CAA AGC TCA ATC TCT GAG CCC TGA TGA<br>TAT G-3'   |



**Supplementary Table 4.** Statistics for data collection and model refinement

| Dataset                                             | MNT <sup>Lpg</sup>                                    |        | HEPN <sup>Lpg</sup> WT |         | HEPN <sup>Lpg</sup> Q64A |          | AMPylated HEPN <sup>Lpg</sup> |          | HEPN <sup>Lpg</sup> -MNT <sup>Lpg</sup> complex |         |
|-----------------------------------------------------|-------------------------------------------------------|--------|------------------------|---------|--------------------------|----------|-------------------------------|----------|-------------------------------------------------|---------|
| Data collection                                     |                                                       |        |                        |         |                          |          |                               |          |                                                 |         |
| Wavelength (Å)                                      | 0.97949                                               |        | 0.97942                |         | 1.02000                  |          | 0.97933                       |          | 0.97942                                         |         |
| Space group                                         | <i>P</i> 2 <sub>1</sub> 2 <sub>1</sub> 2 <sub>1</sub> |        | <i>C</i> 2             |         | <i>P</i> 222             |          | <i>C</i> 2                    |          | <i>C</i> 2                                      |         |
| Cell dimensions                                     |                                                       |        |                        |         |                          |          |                               |          |                                                 |         |
| <i>a</i> , <i>b</i> , <i>c</i> (Å)                  | 58.17,                                                | 61.59, | 143.88,                | 53.19,  | 43.774,                  | 144.199, | 53.296,                       | 113.563, | 93.747,                                         |         |
|                                                     | 66.48                                                 |        | 86.97                  |         | 43.772,                  | 88.021   |                               | 84.958   |                                                 |         |
|                                                     |                                                       |        |                        |         | 163.302                  |          |                               |          |                                                 |         |
| $\alpha$ , $\beta$ , $\gamma$ (°)                   | 90.00,                                                | 90.00, | 90.00,                 | 122.10, | 90.00,                   | 90.00,   | 90.00,                        | 122.31,  | 90.00,                                          | 123.86, |
|                                                     | 90.00                                                 |        | 90.00                  |         | 90.00                    | 90.00    | 90.00                         |          | 90.00                                           |         |
| Resolution range (Å)                                | 50.00–2.79 (2.85–2.79)                                |        | 50.00–1.80 (1.83–1.80) |         | 50.00–1.59 (1.69–1.59)   |          | 50.00–1.65 (1.68–1.65)        |          | 50.00–2.40 (2.44–2.40)                          |         |
| Total/unique reflections                            | 37 577/6 291                                          |        | 345 212/51 227         |         | 273 546/67 303           |          | 444 697/67 341                |          | 195 822/28 576                                  |         |
| Completeness (%)                                    | 99.7 (99.7)                                           |        | 98.4 (99.2)            |         | 83.0 (65.3)              |          | 99.6 (99.5)                   |          | 98.4 (98.1)                                     |         |
| Redundancy                                          | 6.0 (5.2)                                             |        | 6.7 (6.7)              |         | 4.1 (3.2)                |          | 6.6 (6.3)                     |          | 6.9 (6.7)                                       |         |
| R <sub>merge</sub> (%) <sup>a</sup>                 | 13.0 (53.6)                                           |        | 10.2 (58.7)            |         | 6.5 (37.7)               |          | 12.6 (229.3)                  |          | 10.3 (56.0)                                     |         |
| Mean I/σ (I)                                        | 22.3 (2.4)                                            |        | 24.8 (2.7)             |         | 11.8 (1.9)               |          | 35.4 (2.3)                    |          | 20.3 (2.0)                                      |         |
| CC <sub>1/2</sub>                                   | 0.974 (0.967)                                         |        | 0.994 (0.881)          |         | 0.997 (0.862)            |          | 0.996 (0.662)                 |          | 0.996 (0.847)                                   |         |
| Refinement                                          |                                                       |        |                        |         |                          |          |                               |          |                                                 |         |
| Resolution range (Å)                                | 45.18–2.79                                            |        | 48.75–1.80             |         | 42.28–1.59               |          | 29.01–1.65                    |          | 47.15–2.40                                      |         |
| R <sub>work</sub> /R <sub>free</sub> <sup>b</sup>   | 23.1/28.7                                             |        | 16.4/20.4              |         | 18.8/21.4                |          | 17.8/20.8                     |          | 19.8/24.7                                       |         |
| RMSDs                                               |                                                       |        |                        |         |                          |          |                               |          |                                                 |         |
| Bond lengths (Å)                                    | 0.002                                                 |        | 0.006                  |         | 0.011                    |          | 0.013                         |          | 0.002                                           |         |
| Bond angles (°)                                     | 0.451                                                 |        | 0.913                  |         | 0.843                    |          | 1.264                         |          | 0.489                                           |         |
| Number of atoms/average B-factors (Å <sup>2</sup> ) |                                                       |        |                        |         |                          |          |                               |          |                                                 |         |
| Protein                                             | 1528/62.96                                            |        | 4342/30.48             |         | 2198/24.24               |          | 4342/29.03                    |          | 5104/50.49                                      |         |
| Water                                               | 26/54.93                                              |        | 457/39.86              |         | 306/34.11                |          | 394/40.51                     |          | 141/42.44                                       |         |
| Other                                               | -                                                     |        | 2/39.36                |         | 1/22.24                  |          | 90/71.54                      |          | -                                               |         |
| Ramachandran plot                                   |                                                       |        |                        |         |                          |          |                               |          |                                                 |         |
| Most favored (%)                                    | 95.79                                                 |        | 98.84                  |         | 99.24                    |          | 99.03                         |          | 97.88                                           |         |
| Allowed (%)                                         | 4.21                                                  |        | 1.16                   |         | 0.76                     |          | 0.97                          |          | 2.12                                            |         |
| Outliers (%)                                        | 0.00                                                  |        | 0.00                   |         | 0.00                     |          | 0.00                          |          | 0.00                                            |         |
| Rotamer outliers                                    | 0.60                                                  |        | 0.00                   |         | 0.43                     |          | 0.00                          |          | 0.91                                            |         |
| PDB accession code                                  | 8XEO                                                  |        | 8XEM                   |         | 8YUF                     |          | 8XDJ                          |          | 8XEH                                            |         |

<sup>a</sup>  $R_{\text{merge}} = \sum_h \sum_i |I(h)_i - \langle I(h) \rangle| / \sum_h \sum_i I(h)_i$ , where  $I(h)$  is the intensity of reflection  $h$ ,  $\sum_h$  is the sum over all reflections, and  $\sum_i$  is the sum over  $i$  measurements of reflection  $h$ .

<sup>b</sup>  $R = \sum |F_{\text{obs}}| - |F_{\text{calc}}| / \sum |F_{\text{obs}}|$ , where  $R_{\text{free}}$  is calculated for a randomly chosen 5% of reflections, which were not used for structure refinement and  $R_{\text{work}}$  is calculated for the remaining reflections.
